# Supplementary material for: Heterogeneity of Dengue Illness in Community-Based Prospective Study, Iquitos, Peru
Source: Emerg Infect Dis. 2020 Sep;26(9):2077–86. doi: 10.3201/eid2609.191472 (PMC7454099; doi:10.3201/eid2609.191472)
Supplement: Appendix — Additional information on heterogeneity of dengue illness in community-based prospective study, Iquitos, Peru. [file 19-1472-Techapp-s1.pdf]

# Heterogeneity of Dengue Illness in Community-Based Prospective Study, Iquitos, Peru

## Appendix

**Appendix Table 1.** Description of data collected for symptoms of dengue illness on the Illness Perceptions Response form for participants tested for heterogeneity of dengue illness in community-based prospective study, Iquitos, Peru\*

| Symptom            | Presence | Duration | Intensity | Frequency | Time of day | Character | Pattern | Alleviating factor | Location |
|--------------------|----------|----------|-----------|-----------|-------------|-----------|---------|--------------------|----------|
| Malaise            | ✓        | ✓        | ✓         | –         | –           | –         | ✓       | ✓                  | –        |
| Fever              | ✓        | ✓        | ✓         | ✓         | –           | –         | ✓       | ✓                  | –        |
| Chills             | ✓        | ✓        | ✓         | ✓         | –           | –         | ✓       | ✓                  | –        |
| Weakness           | ✓        | ✓        | ✓         | –         | –           | –         | –       | –                  | –        |
| Anorexia           | ✓        | –        | –         | –         | –           | –         | –       | –                  | –        |
| Headache           | ✓        | ✓        | ✓         | –         | ✓           | ✓         | ✓       | ✓                  | ✓        |
| Retroorbital pain  | ✓        | ✓        | ✓         | –         | –           | –         | –       | –                  | –        |
| Body pain          | ✓        | ✓        | ✓         | –         | ✓†          | ✓†        | ✓†      | ✓†                 | ✓†       |
| Bone pain          | ✓        | ✓        | ✓         | –         | ✓†          | ✓†        | ✓†      | ✓†                 | ✓†       |
| Joint pain         | ✓        | ✓        | ✓         | –         | ✓†          | ✓†        | ✓†      | ✓†                 | ✓†       |
| Muscle pain        | ✓        | ✓        | ✓         | –         | ✓†          | ✓†        | ✓†      | ✓†                 | ✓†       |
| Abdominal pain     | ✓        | ✓        | ✓         | –         | –           | ✓         | ✓       | –                  | ✓        |
| Nausea             | ✓        | –        | –         | –         | –           | –         | –       | –                  | –        |
| Vomiting           | ✓        | ✓        | –         | ✓         | –           | –         | –       | –                  | –        |
| Diarrhea           | ✓        | ✓        | –         | ✓         | –           | ✓         | –       | –                  | –        |
| Petechiae          | ✓        | –        | –         | –         | –           | –         | –       | –                  | –        |
| Purpura            | ✓        | –        | –         | –         | –           | –         | –       | –                  | –        |
| Hematemesis        | ✓        | –        | –         | –         | –           | –         | –       | –                  | –        |
| Melena             | ✓        | –        | –         | –         | –           | –         | –       | –                  | –        |
| Gun bleeding       | ✓        | –        | –         | –         | –           | –         | –       | –                  | –        |
| Nasal bleeding     | ✓        | –        | –         | –         | –           | –         | –       | –                  | –        |
| Blood in urine     | ✓        | –        | –         | –         | –           | –         | –       | –                  | –        |
| Vaginal bleeding   | ✓        | –        | –         | –         | –           | –         | –       | –                  | –        |
| Congestion         | ✓        | –        | –         | –         | –           | –         | –       | –                  | –        |
| Sore throat        | ✓        | –        | ✓         | –         | –           | –         | –       | –                  | –        |
| Cough              | ✓        | –        | –         | –         | –           | –         | –       | –                  | –        |
| Jaundice           | ✓        | –        | –         | –         | –           | –         | –       | –                  | –        |
| Maculopapular rash | ✓        | –        | –         | –         | –           | –         | –       | –                  | ✓‡       |
| Erysipelas         | ✓        | –        | –         | –         | –           | –         | –       | –                  | ✓‡       |
| Bad taste          | ✓        | –        | –         | –         | –           | –         | –       | –                  | –        |
| Chest pain         | ✓        | –        | –         | –         | –           | –         | –       | –                  | –        |
| Sputum             | ✓        | –        | –         | –         | –           | –         | –       | –                  | –        |
| Photophobia        | ✓        | –        | –         | –         | –           | –         | –       | –                  | –        |
| Fainting           | ✓        | –        | –         | –         | –           | –         | –       | –                  | –        |
| Ear pain           | ✓        | –        | –         | –         | –           | –         | –       | –                  | –        |
| Itching            | ✓        | –        | –         | –         | –           | –         | –       | –                  | –        |

\*Alleviating factor, factor that helps manage symptoms; character, description of symptoms (includes option for other); duration, number of days ago that the symptom started (asked on the first survey); frequency, no. episodes in previous 24-hour period; intensity, symptom intensity on a scale of 10 based on the smiley face scale; location, location of pain/rash; pattern, comes and goes or constant; presence, presence or absence of these symptoms; time of day, time of day symptoms occurred: morning, afternoon, night (any combination). Checks indicate yes; –. Data not collected.

†Data was collected about the musculoskeletal group not the individual symptoms.

‡Location data was collected for both these rashes together not individually.

**Appendix Table 2.** Comparison of the total number of symptoms experienced by index and contact cases for participants tested for heterogeneity of dengue illness in community-based prospective study, Iquitos, Peru\*

| Symptom | Index, mean (SD) | Contact, mean (SD) | p value                 | Sig_95 | Sig_99 |
|---------|------------------|--------------------|-------------------------|--------|--------|
| All     | 16.1 (4.259)     | 11.1 (4.656)       | 5.81 × 10 <sup>-5</sup> | True   | True   |

\*Sig\_95, significant at the 5% level; Sig\_99, significant at the 1% level.

**Appendix Table 3.** Comparison of the proportion of participants experiencing each symptom for Index and Contact cases for participants tested for heterogeneity of dengue illness in community-based prospective study, Iquitos, Peru\*

| Symptom            | Group           | Index, no. (%) | Contact, no. (%) | p value                 | Sig_95 | Sig_99 |
|--------------------|-----------------|----------------|------------------|-------------------------|--------|--------|
| Bad taste          | Other           | 41 (74.5)      | 6 (25)           | 5.43 × 10 <sup>-5</sup> | True   | True   |
| Chills             | Fever           | 51 (92.7)      | 14 (58.3)        | 5.94 × 10 <sup>-4</sup> | True   | False  |
| Fever              | Fever           | 55 (100)       | 19 (79.2)        | 0.00188592              | False  | False  |
| Sore throat        | Respiratory     | 21 (38.2)      | 2 (8.3)          | 0.00724521              | False  | False  |
| Vomiting           | Abdominal       | 29 (52.7)      | 5 (20.8)         | 0.01278489              | False  | False  |
| Headache           | Headache        | 53 (96.4)      | 19 (79.2)        | 0.02444751              | False  | False  |
| Weakness           | Constitutional  | 55 (100)       | 21 (87.5)        | 0.02559466              | False  | False  |
| Photophobia        | Headache        | 11 (20)        | 0 (0)            | 0.02866452              | False  | False  |
| Itching            | Cutaneous       | 31 (56.4)      | 7 (29.2)         | 0.03032907              | False  | False  |
| Retroorbital pain  | Headache        | 42 (76.4)      | 12 (50)          | 0.03405395              | False  | False  |
| Fainting           | Other           | 26 (47.3)      | 6 (25)           | 0.08283892              | False  | False  |
| Gum bleeding       | Bleeding        | 7 (12.7)       | 0 (0)            | 0.09445268              | False  | False  |
| Cough              | Respiratory     | 13 (23.6)      | 2 (8.3)          | 0.13202128              | False  | False  |
| Erysipelas         | Cutaneous       | 31 (56.4)      | 9 (37.5)         | 0.14711476              | False  | False  |
| Chest pain         | Other           | 10 (18.2)      | 1 (4.2)          | 0.15815388              | False  | False  |
| Joint pain         | Musculoskeletal | 34 (61.8)      | 11 (45.8)        | 0.2218841               | False  | False  |
| Anorexia           | Constitutional  | 51 (92.7)      | 20 (83.3)        | 0.23674371              | False  | False  |
| Malaise            | Constitutional  | 55 (100)       | 23 (95.8)        | 0.30379747              | False  | False  |
| Diarrhea           | Abdominal       | 22 (40)        | 6 (25)           | 0.30633875              | False  | False  |
| Hematemesis        | Bleeding        | 5 (9.1)        | 0 (0)            | 0.31553323              | False  | False  |
| Purpura            | Bleeding        | 5 (9.1)        | 0 (0)            | 0.31553323              | False  | False  |
| Abdominal pain     | Abdominal       | 35 (63.6)      | 12 (50)          | 0.32124216              | False  | False  |
| Maculopapular rash | Cutaneous       | 10 (18.2)      | 2 (8.3)          | 0.32761681              | False  | False  |
| Petechiae          | Bleeding        | 7 (12.7)       | 1 (4.2)          | 0.42342415              | False  | False  |
| Nausea             | Abdominal       | 38 (69.1)      | 14 (58.3)        | 0.44086771              | False  | False  |
| Bone pain          | Musculoskeletal | 37 (67.3)      | 14 (58.3)        | 0.45571627              | False  | False  |
| Vaginal bleeding   | Bleeding        | 1 (1.8)        | 1 (4.2)          | 0.51801363              | False  | False  |
| Muscle pain        | Musculoskeletal | 41 (74.5)      | 16 (66.7)        | 0.58640912              | False  | False  |
| Ear pain           | Respiratory     | 5 (9.1)        | 1 (4.2)          | 0.66135318              | False  | False  |
| Congestion         | Respiratory     | 7 (12.7)       | 2 (8.3)          | 0.71490855              | False  | False  |
| Body pain          | Musculoskeletal | 43 (78.2)      | 18 (75)          | 0.77594226              | False  | False  |
| Blood in urine     | Bleeding        | 3 (5.5)        | 1 (4.2)          | 1                       | False  | False  |
| Melena             | Bleeding        | 2 (3.6)        | 0 (0)            | 1                       | False  | False  |

\*Sig\_95, significant at the 5% level; Sig\_99, significant at the 1% level.

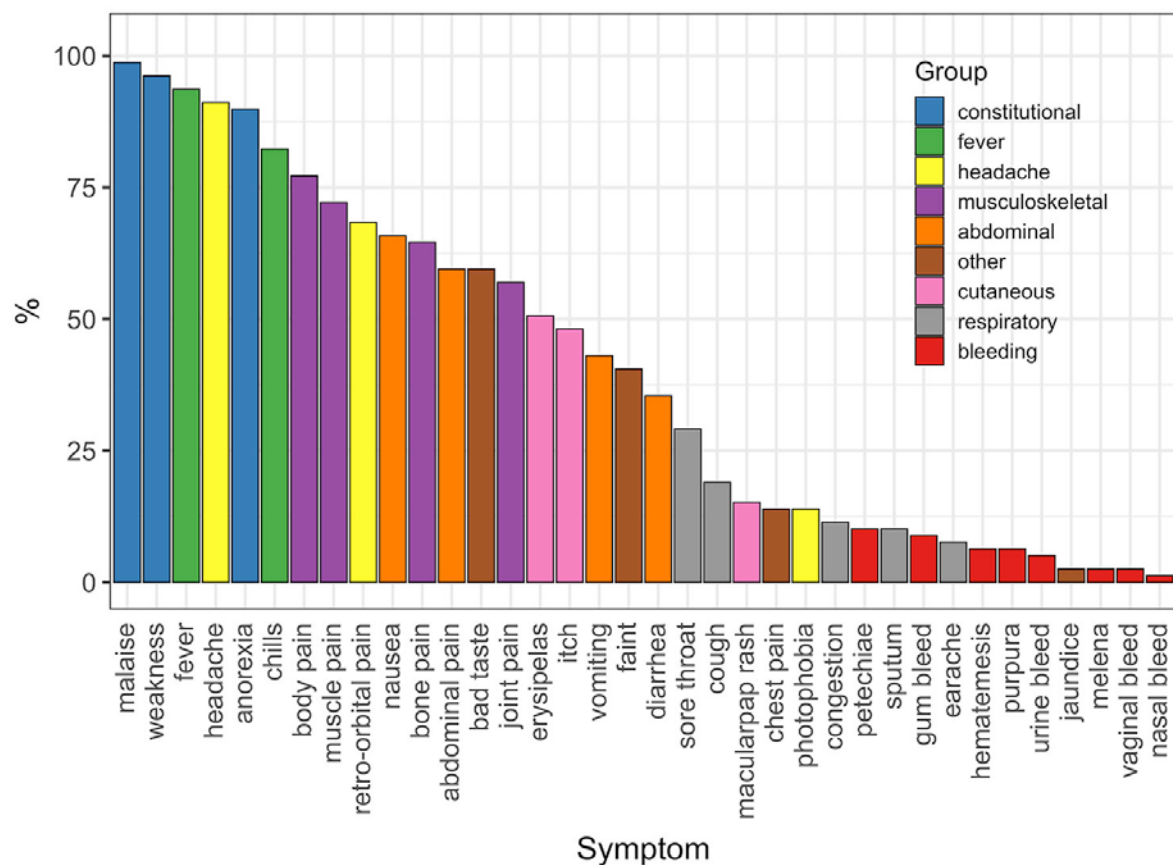

**Appendix Figure 1.** Percentages for 79 participants reporting specific symptoms during acute dengue illness during testing for heterogeneity of dengue illness in community-based prospective study, Iquitos, Peru. Numbers above each bar indicate number of persons reporting the symptom. Colors represent clinically defined groups.

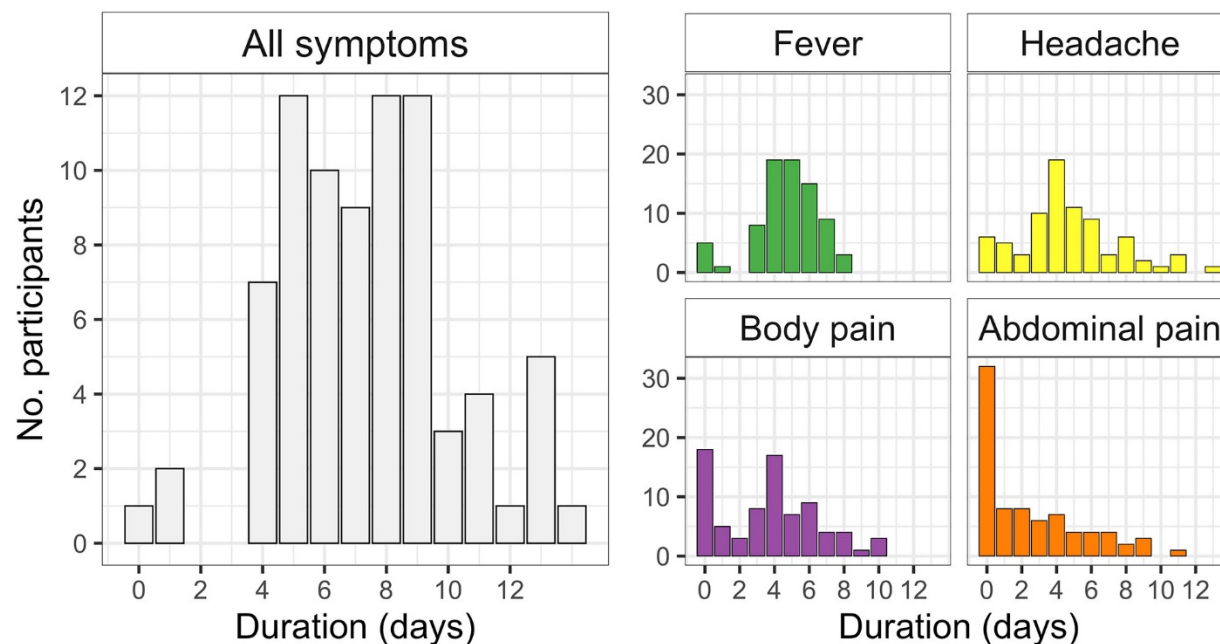

**Appendix Figure 2.** Histograms of duration (in days) of illness (any symptom) and specific symptoms experienced by participants who had dengue illness during testing for heterogeneity of dengue illness in community-based prospective study, Iquitos, Peru Colors in the right 4 panels indicate symptom categories defined in Figure 1.
